# Supplementary material for: Crucial contribution of the multiple copies of the initiator tRNA genes in the fidelity of tRNAfMet selection on the ribosomal P-site in Escherichia coli
Source: PubMed Central journal article supplement — Nucleic Acids Res. 2010 Aug 26;39(1):202–12. doi: 10.1093/nar/gkq760 (PMC3017606; doi:10.1093/nar/gkq760), 2010-08-26
Supplement: supp_gkq760_Kapoor_et_al_SOM.pdf [file supp_gkq760_Kapoor_et_al_SOM.pdf]

*Supplementary Online Material*

**Crucial contribution of the multiple copies of the initiator tRNA genes in the fidelity of tRNA<sup>fMet</sup> selection on the ribosomal P-site in *Escherichia coli***

Suman Kapoor<sup>1</sup>, Gautam Das<sup>1</sup> and Umesh Varshney<sup>1,2,\*</sup>, <sup>1</sup>Department of Microbiology and Cell Biology, Indian Institute of Science, Bangalore 560012; <sup>2</sup>Jawaharlal Nehru Centre for Advanced Scientific Research, Bangalore 560064, India

\*Correspondence: Umesh Varshney, Department of Microbiology and Cell Biology, Indian Institute of Science, Bangalore-560012, India. *Phone*: 91-80-2293 2686; *Fax*: 91-80-2360 2697; *E-mail*: uvarshney@gmail.com; varshney@mcbl.iisc.ernet.in

*Running title*: tRNA selection on ribosomal P-site

*Keywords*: Initiation with elongator tRNA, tRNA<sup>fMet</sup> gene copy number, promoter mutations, cold sensitivity, proteome remodeling.

## Supplementary results

### Mapping of the mutations in the suppressors strains D4 and D27:

P1 phage mediated transduction experiments showed that the mutation(s) responsible for the phenotypes of D4 and D27 were located at a single locus (*data not shown*). Genetic mapping of the locus was carried out by the method of generating miniTn10 (confers resistance to kanamycin, Kan<sup>R</sup>) insertion libraries in D4 and D27 using phage λNK1316 as delivery vehicle (Kleckner *et al.*, 1991). P1 phage lysates raised on these libraries were used to transduce *E. coli* KL16 harboring pCAT<sub>ami1</sub>metY<sub>CUA/3GC</sub> and selection of transductants on Kan. Transductants were then replica plated onto Kan plus Cm plates. P1 phage lysates were raised on many of the co-transductants (Cm<sup>R</sup>Kan<sup>R</sup>), and used to transduce *E. coli* KL16 harboring pCAT<sub>ami1</sub>metY<sub>CUA/3GC</sub> and selection on Kan. This was followed by patching of transductants on Kan, and Kan plus Cm plates. The transductant (Kan<sup>R</sup>Cm<sup>R</sup>) with the highest co-transduction frequency (~ 80% in D4 and ~75% in D27) were selected for mapping. High linkage of the chromosomal mutation conferring Cm<sup>R</sup> with the Kan mini-transposon was further confirmed by back transductional crosses on D4 and D27 using P1 phage lysates raised on the selected transductants that showed Kan<sup>R</sup>Cm<sup>S</sup> phenotype upon patching. To map the chromosomal location of the transposon, we followed the inverse PCR technique (Higashitani *et al.*, 1994). Sequence analysis of ~400 bp amplicons (Macrogen, S. Korea) revealed that the transposon was inserted within *csdA* in D4 (at 63.4 min) and *fucP* in D27 (at 63.2 min). To validate these locations, transductional crosses of D4 and D27 were performed with CAG12137 (Tet<sup>R</sup>, 62.2 min) and CAG12135 (Tet<sup>R</sup>, 63.6 min) strains which confirmed that the mutations in D4 and D27 lie closer to 63.6 min locus. Additional crosses between *csdA::kan*, CAG12135, D4 and D27 strains in various combinations limited the site of mutation between the 63.4 and 63.6 min region of the *E. coli* genome (Fig. S2). A high probability candidate within this region, the *metZWW* operon encoding for the majority of tRNA<sup>fMet</sup> in *E. coli*, was amplified by PCR (Experimental procedures) and subjected to DNA sequence analysis (Fig. S3) to reveal that D4 and D27 possessed novel mutations within the promoter region of *metZWW* (Fig. 2A).

### **Promoter mutations in *metZ WV* in D4 and D27 independently confer the ability to initiate with the 3GC initiator tRNA:**

To ensure that the promoter mutations (Fig. 2A) identified in D4 and D27, independently confer the ability to initiate with the 3GC tRNA, we targeted the promoter mutations to *E. coli* genome using  $\lambda$  recombineering (Datsenko and Wanner, 2000). The 0.45 kb amplicons harboring *metZ WV* from D4 and D27 containing single mutations and the KL16 parent (as control) were electroporated into *E. coli* DY330 harboring pCAT<sub>am1</sub>*metY*<sub>CUA/3GC</sub>. Transformants were selected on Amp plus Cm plates. As shown in Fig. S4, *E. coli* DY330 transformants that appeared upon introduction of the amplicons from D4 and D27, grew on Cm plates like D4 and D27 (compare sectors 3 and 5; and 4 and 6). However, a few colonies that appeared on the plate wherein the amplicon from the KL16 parent was used as a control, failed to grow further on Cm plate (sectors 1 and 2). These observations suggest that the promoter mutations identified in D4 and D27 are sufficient to confer the ability to initiate with the 3GC mutant tRNA in *E. coli*.

### **Supplementary experimental procedures**

#### **Linear DNA transformations:**

Amplicons (0.45 kb) of *metZ WV* gene locus were prepared from *E. coli* D4, D27 or the KL16 genomic DNA by PCR using *Pfu* DNA polymerase and 20 pmols each of the forward (5' tgttttgttcaaaatcatgcc 3') and reverse (5' ctggcgagaaggggatgataaaaaggcgctgaatgg 3') primers and electroporated into *E. coli* DY330 harboring pCAT<sub>am1</sub>*metY*<sub>CUA/3GC</sub>. Transformants were selected on Amp plus Cm (50  $\mu\text{g ml}^{-1}$ ) plates at 30 °C (Datsenko and Wanner, 2000).

## Supplementary references

1. Dastur, A., Kumar, P., Ramesh, S., Vasanthakrishna, M., and Varshney, U. (2002) Analysis of the initiator tRNA genes from a slow- and a fast-growing mycobacterium. *Arch Microbiol* **178**: 288-296.
2. Datsenko, K.A., and Wanner, B.L. (2000) One-step inactivation of chromosomal genes in *Escherichia coli* K-12 using PCR products. *Proc Natl Acad Sci USA* **97**: 6640-6645.
3. Higashitani, A., Higashitani, N., Yasuda, S. and Horiuchi, K. (1994). A general and fast method for mapping mutations on the *Escherichia coli* chromosome. *Nucleic Acids Res* **22**: 2426-2427.
4. Kleckner, N., Bender J., and Gottesman S. (1991) Uses of transposons with emphasis on Tn10. *Methods Enzymol* **204**: 139–180.
5. Lee, C., Yu, D., Velasco, M., Tessarollo, L., Swing, D.A., Court, D.L., Jenkins, N.A., and Copeland, N.G. (2001) A highly efficient *Escherichia coli*-based chromosome engineering system adapted for recombinogenic targeting and subcloning of BAC DNA. *Genomics* **73**: 56–65.
6. Low, K.B. (1968) Formation of merodiploids in matings with a class of Rec- recipient strains of *Escherichia coli* K12. *Proc Natl Acad Sci USA* **60**: 160-167.
7. Mandal, N., Mangroo, D., Dalluge, J.J., McCloskey, J.A., and RajBhandary, U.L. (1996) Role of the three consecutive G:C base pairs conserved in the anticodon stem of initiator tRNAs in initiation of protein synthesis in *Escherichia coli*. *RNA* **2**: 473–482.
8. Nichols, B.P., Shafiq, O., and Meiners, V. (1998) Sequence analysis of Tn10 insertion sites in a collection of *Escherichia coli* strains used for genetic mapping and strain construction. *J Bacteriol* **180**: 6408-6411.
9. Rao, A.R., and Varshney, U. (2002) Characterization of *Mycobacterium tuberculosis* ribosome recycling factor (RRF) and a mutant lacking six amino acids from the C-terminal end reveals that the C-terminal residues are important for its occupancy on the ribosome. *Microbiology* **148**: 3913–3920.
10. Sambrook, J.F., Fritsch, E.F., and Maniatis, T. (1989) Molecular cloning: A Laboratory manual, 2nd Edn. (Cold Spring Harbor Laboratory Press. Cold Spring Harbor, NY.
11. Singer, M., Baker, T.A., Schnitzler, G., Deischel, S.M., Goel, M., Dove, W., Jaacks, K.J., Grossman, A.D., Erickson, J.W., and Gross, C.A. (1989) A collection of strains containing genetically linked alternating antibiotic resistance elements for genetic mapping of *Escherichia coli*. *Microbiol Rev* **53**: 1-24.
12. Varshney, U., and RajBhandary, U.L. (1990) Initiation of protein synthesis from a termination codon. *Proc Natl Acad Sci USA* **87**: 1586 –1590.

## Supplementary figure legends

**Figure S1:** Growth of D4 and D27 harboring pCAT<sub>am1</sub> or pCAT<sub>am1</sub>metY<sub>CUA/3GC</sub>. Cultures were grown in LB containing Amp and streaked on LB-agar plates containing Amp, and Amp plus Cm, and incubated at 37 °C for 15 h.

**Figure S2:** Genetic fine mapping of the suppressor mutation in *E. coli* D4 and D27. The mutations responsible for the D4 and D27 were mapped to a location between *csdA* (63.4') and *recD* (63.6'). The *metZWW* locus (63.5 min) was PCR amplified as 0.45 kb (KL16 and D4) or ~1.27 kb (D27) fragment.

**Figure S3:** *Upper panel*, the 0.45 kb amplicons (Fig. S2) from the KL16 parent and D4, and the ~1.27 kb amplicon from D27 (Fig. S2) were subjected to DNA sequence analysis (Macrogen, S. Korea) with primers 5' tgttttggttcaaaatcatgccaaatccgtgatcgg 3' for KL16 and D4, and 5' ctggctgggtcaccagagagaa 3' for D27. Chromatograms corresponding to the sequence in the promoter region of the *metZWW* are shown. The arrows indicate the sites of mutations. *Lower panel*: Comparative analysis of the promoter regions of D4 and D27 *metZWW* locus with that of the parent (WT). There is a G to A mutation in D4 just upstream to the Pribnow box (-10) and a T to C mutation in D27 within the Pribnow box (-10). The mutations have been indicated by boxes between the sequences of the wild-type (WT) and the suppressor strain promoter. The -35 region, the spacing between the -10 and the -35 sequences and the transcription start site (+1) are also indicated.

**Figure S4:** The 0.45 kb amplicons (Fig. S2) from the KL16 parent or the D4 and D27 suppressor strains were introduced into *E. coli* DY330 harboring pCAT<sub>am1</sub>metY<sub>CUA/3GC</sub> (Amp<sup>R</sup>) and the transformants were selected on LB-agar plates containing Amp plus Cm at the permissive temperature of 30 °C. The colonies that appeared were grown in LB containing Amp and streaked on LB-agar plates containing Amp; Amp plus Cm (50 µg ml<sup>-1</sup>); and Amp plus Cm (100 µg ml<sup>-1</sup>), as indicated and incubated at 30 °C for approximately 36 h.

**Figure S5:** Initiation with elongator tRNA. D4 and D27 harboring pCAT<sub>am1</sub> (Amp<sup>R</sup>, colE1 ori) and pACDH (vector alone) or pACDH<sub>supE</sub>, (Tet<sup>R</sup>, pAC1 ori) compatible plasmids were grown in LB containing Amp plus Tet and streaked on LB-agar plates containing Amp plus Tet; and Amp plus Tet plus Cm (50 µg ml<sup>-1</sup>) and incubated at 37 °C for 15 h.

**Table-S1**

| <b>Strains /Plasmids</b>           | <b>Genotype/Details</b>                                                                                                     | <b>Reference/Source</b>            |
|------------------------------------|-----------------------------------------------------------------------------------------------------------------------------|------------------------------------|
| <i>E. coli</i> strains             |                                                                                                                             |                                    |
| KL16                               | <i>E. coli</i> K-12, <i>thi1</i> , <i>relA1</i> , <i>spoT1</i>                                                              | Low, 1968                          |
| TG1                                | SupE hsdD5 thi D(lac-proAB) F_<br>[traD36 proAB+ lacIq lacZDM15]                                                            | Sambrook <i>et al.</i> , 1989      |
| D4                                 | A derivative of KL16, isolated as a suppressor of 3GC mutant tRNA.                                                          | This work                          |
| D27                                | A derivative of KL16, isolated as a suppressor of 3GC mutant tRNA.                                                          | This work                          |
| DY330                              | W3110 DlacU169 gal490<br>[lc1857D(cro-bioA)]                                                                                | Lee <i>et al.</i> , 2001           |
| TG1 $\Delta$ <i>metZVW::kan</i>    | <i>E. coli</i> TG1 wherein <i>metZVW</i> operon has been replaced with a Kan <sup>R</sup> encoding cassette.                | This work                          |
| KL16 $\Delta$ <i>metZVW::kan</i>   | <i>E. coli</i> KL16 wherein <i>metZVW</i> operon has been replaced with a Kan <sup>R</sup> encoding cassette.               | This work                          |
| KL16 $\Delta$ <i>metY::kan</i>     | <i>E. coli</i> KL16 wherein <i>metY</i> has been replaced with a Kan <sup>R</sup> encoding cassette.                        | This work                          |
| D4/D27 $\Delta$ <i>metZVW::kan</i> | <i>E. coli</i> D4 or D27 strains wherein <i>metZVW</i> operons have been replaced with Kan <sup>R</sup> encoding cassettes. | This work                          |
| D4/D27 $\Delta$ <i>metY::kan</i>   | <i>E. coli</i> D4 or D27 strains wherein <i>metY</i> have been replaced with Kan <sup>R</sup> encoding cassettes.           | This work                          |
| CAG12135                           | <i>recD1901::Tn10</i> at 63.6 min                                                                                           | CGSC, Singer <i>et al.</i> , 1989; |
| CAG12173                           | <i>cysC95::Tn10</i> at 62.2 min                                                                                             | Nichols <i>et al.</i> , 1998       |

**Table-S2**

| <b>Plasmid</b>                                                        | <b>Details</b>                                                                                                                                                                                                                                           | <b>Reference/ Source</b>                   |
|-----------------------------------------------------------------------|----------------------------------------------------------------------------------------------------------------------------------------------------------------------------------------------------------------------------------------------------------|--------------------------------------------|
| pCAT <sub>am1</sub> (Amp <sup>R</sup> )                               | Renamed from pRSVCAT <sub>am1.2.5</sub> . Harbors a CAT reporter gene with UAG initiation codon.                                                                                                                                                         | Varshney and RajBhandary (1990)            |
| pCAT <sub>am1</sub> metY <sub>CUA</sub> (Amp <sup>R</sup> )           | pCAT <sub>am1</sub> harboring metY gene which encodes tRNA <sup>fMet</sup> with CUA anticodon.                                                                                                                                                           |                                            |
| pCAT <sub>am1</sub> metY <sub>CUA/3GC</sub> (Amp <sup>R</sup> )       | Derivative of pCAT <sub>am1</sub> metY <sub>CUA</sub> with additional mutations in metY at positions 29:41, 30:40 and 31:39 (from G:C, G:C and G:C to U:A, C:G and A:U).                                                                                 | Mandal <i>et al.</i> , (1996)              |
| pACDH (Tet <sup>R</sup> )                                             | A cloning vector harboring ACYC Ori of replication, which is compatible with ColE1 Ori of replication plasmids.                                                                                                                                          | Rao and Varshney, 2002                     |
| pKD4 (Amp <sup>R</sup> , Kan <sup>R</sup> )                           | Amp <sup>R</sup> , Kan <sup>R</sup> ; kan marker is flanked by FRT sequences.                                                                                                                                                                            | Datsenko and Wanner (2000)                 |
| pACDHN (Tet <sup>R</sup> )                                            | pACDH was digested with NcoI and EcoRI, end-filled and ligated.                                                                                                                                                                                          | Dastur and Varshney ( <i>unpublished</i> ) |
| pACDHN-CAT <sub>am1</sub> metY <sub>CUA/3GC</sub> (Tet <sup>R</sup> ) | HindIII-XmnI fragment from pCAT <sub>am1</sub> metY <sub>CUA/3GC</sub> harboring CAT <sub>am1</sub> and metY <sub>CUA/3GC</sub> genes was cloned into HindIII and Bst1107I sites of pACDHN.                                                              |                                            |
| pACDHNmetY <sub>CUA/3GC</sub> (Tet <sup>R</sup> )                     | pACDHN-CAT <sub>am1</sub> metY <sub>CUA/3GC</sub> was digested with HindIII and BamHI (limited) and end-filled; the largest fragment lacking CAT <sub>am1</sub> gene was eluted from agarose gel and ligated to generate pACDHNmetY <sub>CUA/3GC</sub> . | This work                                  |
| pACDHsupE (Tet <sup>R</sup> )                                         | <i>E. coli</i> TG1 GlnVX cloned into pACDH between NcoI and EcoRI sites.                                                                                                                                                                                 | This work                                  |
| pTKCAT (Kan <sup>R</sup> )                                            | <i>E. coli</i> -mycobacteria shuttle vector generated by replacing xylE from pTKmx with promoterless CAT cassette.                                                                                                                                       | Dastur <i>et al.</i> , (2002)              |
| pTK-KL16-CAT (Kan <sup>R</sup> )                                      | pTKCAT containing promoter of metZWW from <i>E. coli</i> KL16, upstream of the CAT reporter cassette.                                                                                                                                                    | This work                                  |
| pTK-D4-CAT (Kan <sup>R</sup> )                                        | pTKCAT containing promoter of metZWW from <i>E. coli</i> suppressor D4, upstream of the CAT reporter cassette.                                                                                                                                           | This work                                  |
| pTK-D27-CAT (Kan <sup>R</sup> )                                       | pTKCAT containing promoter of the metZWW from <i>E. coli</i> suppressor D27, upstream of the CAT reporter cassette.                                                                                                                                      | This work                                  |

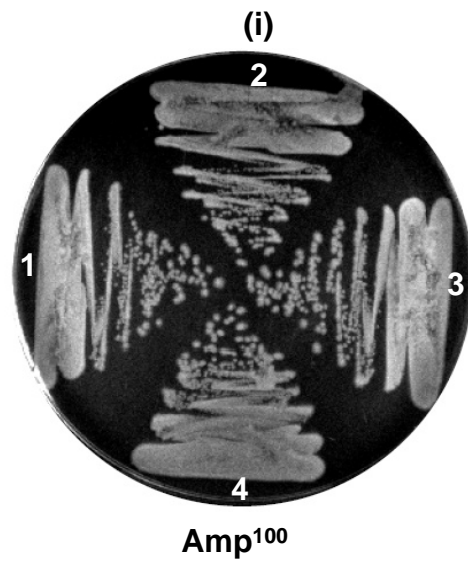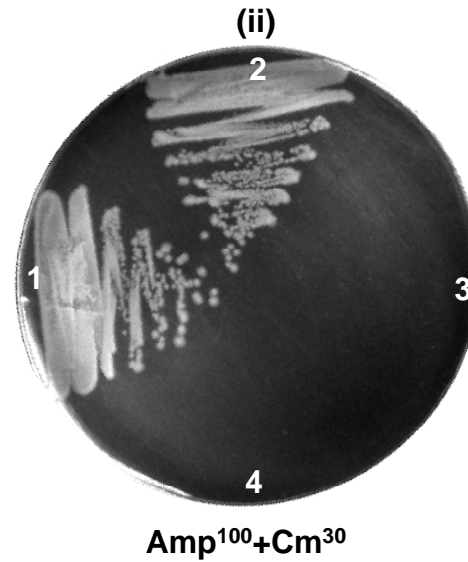

**Sectors:**

- 1.D4+pCAT<sub>am1</sub>*metY*<sub>CUA/3GC</sub>
- 2.D27+pCAT<sub>am1</sub>*metY*<sub>CUA/3GC</sub>
- 3.D4+pCAT<sub>am1</sub>
- 4.D27+pCAT<sub>am1</sub>



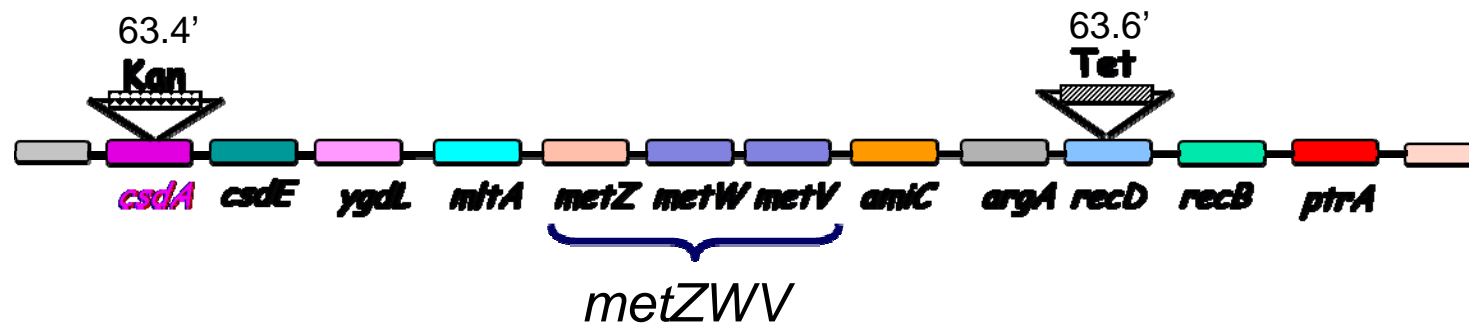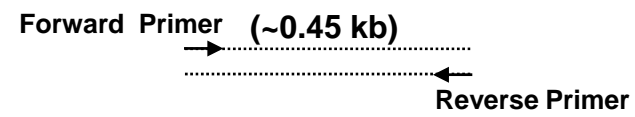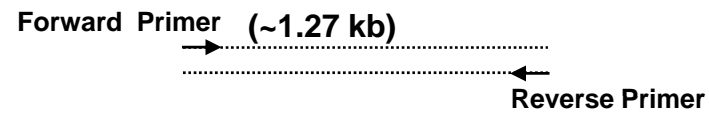



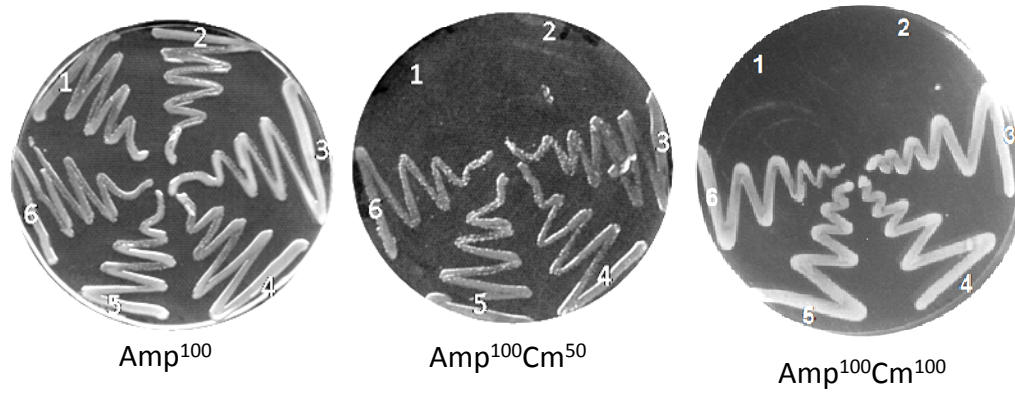

**Sectors**

1. DY330 (KL16) +pCAT<sub>am1</sub>*metY*<sub>CUA/3GC</sub>
2. DY330 (KL16) +pCAT<sub>am1</sub>*metY*<sub>CUA/3GC</sub>
3. D4+pCAT<sub>am1</sub>*metY*<sub>CUA/3GC</sub>
4. D27+pCAT<sub>am1</sub>*metY*<sub>CUA/3GC</sub>
5. DY330(D4)+pCAT<sub>am1</sub>*metY*<sub>CUA/3GC</sub>
6. DY330 (D27)+pCAT<sub>am1</sub>*metY*<sub>CUA/3GC</sub>

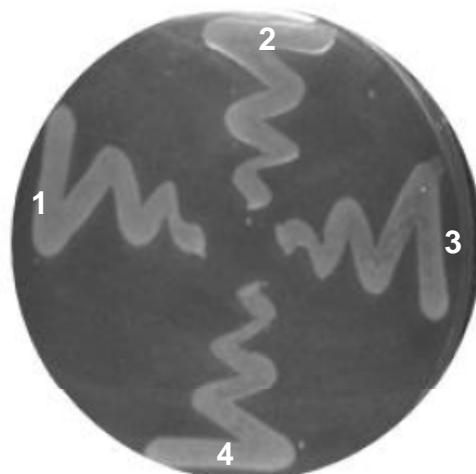

**Amp<sup>100</sup>Tet<sup>7.5</sup>**

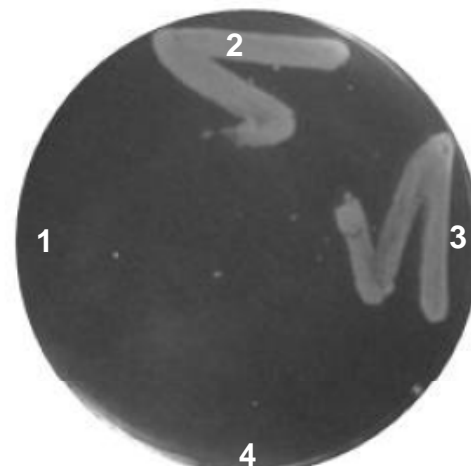

**Amp<sup>100</sup>Tet<sup>7.5</sup>Cm<sup>50</sup>**

**Sectors:**

1. D4+pCAT<sub>am1</sub>+pACDH
2. D4+pCAT<sub>am1</sub>+pACDH<sup>supE</sup>
3. D27+pCAT<sub>am1</sub>+pACDH<sup>supE</sup>
4. D27+pCAT<sub>am1</sub>+pACDH
